# Supplementary material for: Differential Discontinuation Profiles between Pirfenidone and Nintedanib in Patients with Idiopathic Pulmonary Fibrosis
Source: MDPI journal article supplement (doi:10.3390/cells11010143), 2022-01-02
Supplement: s1 [file s1]

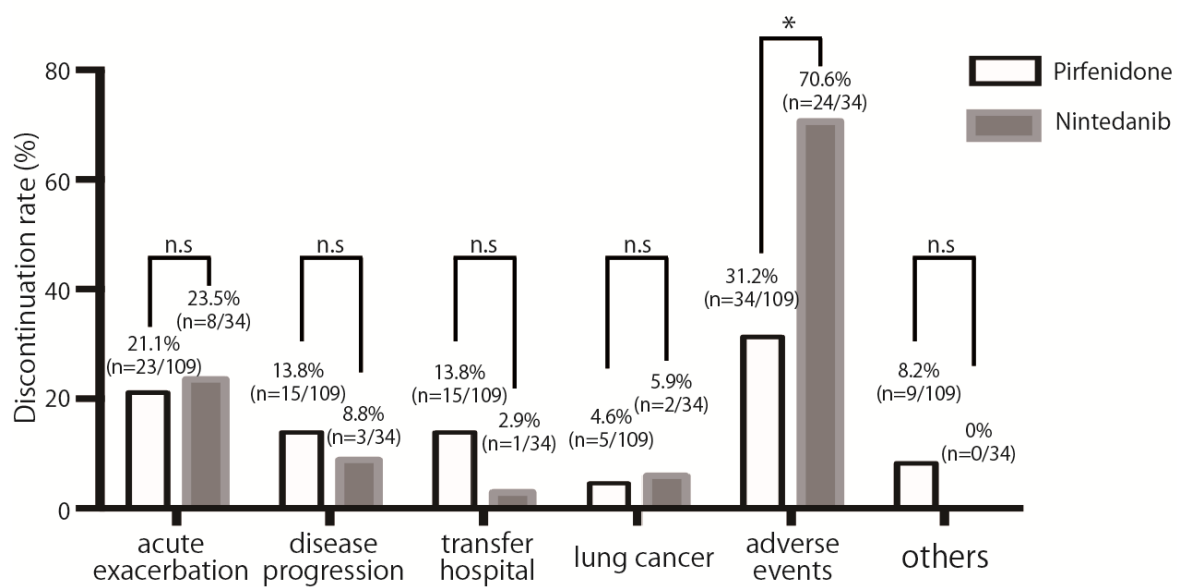

**Figure S1.** Comparison of discontinuation reasons during the whole period between pirfenidone and nintedanib.
